# Supplementary material for: Genomic expression program of Saccharomyces cerevisiae along a mixed-culture wine fermentation with Hanseniaspora guilliermondii
Source: PubMed Central journal article supplement (PMC4552253; doi:10.1186/s12934-015-0318-1), 2015-08-28
Supplement: 12934_2015_318_MOESM1_ESM.pdf [file 12934_2015_318_MOESM1_ESM.pdf]

**Additional file 3 - Association between *S. cerevisiae* genes whose expression was up-regulated along the single or mixed wine fermentations with their documented regulators**

|        | Sc 24h | Sc 48h | Sc 96h | Mc 24h | Mc 48h | Mc 96h |
|--------|--------|--------|--------|--------|--------|--------|
| Abf1p  | 292    | 161    | 234    | 225    | 80     | 135    |
| Aca1p  | 0      | 1      | 0      | 0      | 0      | 0      |
| Ace2p  | 20     | 17     | 14     | 14     | 6      | 8      |
| Adr1p  | 58     | 78     | 110    | 41     | 31     | 84     |
| Aft1p  | 55     | 27     | 39     | 37     | 11     | 19     |
| Aft2p  | 8      | 18     | 37     | 6      | 5      | 13     |
| Arg80p | 15     | 6      | 10     | 15     | 5      | 2      |
| Arg81p | 11     | 2      | 13     | 12     | 2      | 4      |
| Aro80p | 10     | 13     | 20     | 6      | 7      | 8      |
| Arr1p  | 2      | 5      | 3      | 3      | 3      | 3      |
| Ash1p  | 18     | 17     | 24     | 10     | 7      | 16     |
| Azf1p  | 11     | 2      | 9      | 6      | 1      | 5      |
| Bas1p  | 32     | 16     | 17     | 19     | 14     | 5      |
| Cad1p  | 43     | 68     | 28     | 32     | 39     | 34     |
| Cat8p  | 4      | 5      | 10     | 3      | 0      | 8      |
| Cbf1p  | 115    | 71     | 117    | 81     | 33     | 63     |
| Cha4p  | 16     | 10     | 6      | 12     | 2      | 1      |
| Crz1p  | 9      | 13     | 7      | 6      | 2      | 7      |
| Cst6p  | 1      | 1      | 1      | 0      | 0      | 0      |
| Cup9p  | 13     | 11     | 13     | 7      | 5      | 9      |
| Dal81p | 30     | 31     | 32     | 33     | 14     | 19     |
| Dal82p | 26     | 16     | 19     | 24     | 8      | 7      |
| Ecm22p | 19     | 5      | 23     | 10     | 1      | 7      |
| Esa1p  | 2      | 0      | 0      | 2      | 0      | 0      |
| Elp6p  | 0      | 0      | 1      | 0      | 0      | 1      |
| Fhl1p  | 199    | 71     | 128    | 162    | 39     | 70     |
| Fkh2p  | 70     | 34     | 35     | 52     | 16     | 18     |
| Flo8p  | 43     | 29     | 50     | 31     | 12     | 35     |
| Fzf1p  | 14     | 16     | 11     | 8      | 8      | 10     |
| Gal4p  | 13     | 11     | 19     | 5      | 2      | 7      |
| Gat1p  | 18     | 11     | 20     | 13     | 5      | 14     |
| Gat3p  | 28     | 8      | 16     | 25     | 3      | 4      |
| Gcn4p  | 80     | 56     | 51     | 62     | 53     | 29     |
| Gcr1p  | 8      | 6      | 6      | 9      | 3      | 2      |
| Gcr2p  | 18     | 9      | 13     | 15     | 4      | 6      |
| Gln3p  | 21     | 20     | 21     | 25     | 7      | 12     |
| Gsm1p  | 1      | 0      | 7      | 1      | 0      | 5      |
| Gts1p  | 4      | 8      | 15     | 5      | 5      | 10     |
| Haa1p  | 1      | 2      | 0      | 0      | 1      | 1      |
| Hac1p  | 1      | 1      | 2      | 1      | 1      | 0      |
| Hal9p  | 14     | 4      | 11     | 15     | 1      | 7      |
| Hap1p  | 8      | 16     | 37     | 3      | 7      | 30     |
| Hap2p  | 22     | 17     | 41     | 18     | 1      | 14     |
| Hap3p  | 21     | 16     | 37     | 13     | 3      | 14     |

|        |     |     |     |     |    |     |
|--------|-----|-----|-----|-----|----|-----|
| Hap4p  | 22  | 16  | 42  | 11  | 3  | 19  |
| Hap5p  | 20  | 19  | 43  | 12  | 1  | 18  |
| Hcm1p  | 32  | 33  | 49  | 29  | 15 | 26  |
| Hmo1p  | 193 | 85  | 159 | 140 | 39 | 99  |
| Hms1p  | 9   | 3   | 6   | 7   | 2  | 2   |
| Hms2p  | 5   | 3   | 7   | 2   | 1  | 4   |
| Hot1p  | 7   | 31  | 15  | 6   | 12 | 21  |
| Hsf1p  | 23  | 33  | 49  | 18  | 11 | 30  |
| lfh1p  | 135 | 25  | 23  | 131 | 13 | 14  |
| lme1p  | 1   | 1   | 2   | 1   | 0  | 2   |
| Ino2p  | 11  | 5   | 12  | 8   | 0  | 4   |
| Ino4p  | 97  | 47  | 95  | 57  | 20 | 38  |
| Leu3p  | 39  | 26  | 27  | 29  | 18 | 13  |
| Mac1p  | 10  | 7   | 13  | 8   | 4  | 5   |
| Mal13p | 1   | 1   | 18  | 2   | 1  | 0   |
| Mal33p | 20  | 10  | 41  | 10  | 4  | 10  |
| Mbp1p  | 68  | 22  | 52  | 53  | 13 | 18  |
| Mcm1p  | 69  | 27  | 1   | 48  | 13 | 24  |
| Met28p | 14  | 5   | 7   | 11  | 4  | 2   |
| Met31p | 26  | 9   | 12  | 21  | 8  | 5   |
| Met32p | 56  | 28  | 82  | 44  | 18 | 51  |
| Met4p  | 36  | 28  | 63  | 25  | 17 | 42  |
| Mga1p  | 43  | 24  | 51  | 38  | 11 | 27  |
| Mga2p  | 2   | 1   | 6   | 1   | 0  | 2   |
| Mot2p  | 4   | 2   | 3   | 6   | 1  | 1   |
| Mot3p  | 10  | 7   | 12  | 8   | 3  | 9   |
| Msn1p  | 16  | 11  | 12  | 12  | 6  | 6   |
| Msn2p  | 194 | 172 | 266 | 131 | 68 | 164 |
| Msn4p  | 23  | 37  | 40  | 13  | 13 | 26  |
| Mss11p | 19  | 7   | 7   | 10  | 2  | 4   |
| Ndd1p  | 7   | 0   | 1   | 5   | 0  | 0   |
| Ndt80p | 2   | 0   | 2   | 1   | 0  | 1   |
| Oaf1p  | 54  | 40  | 78  | 41  | 17 | 43  |
| Pdc2p  | 2   | 3   | 1   | 2   | 1  | 0   |
| Pdr1p  | 50  | 45  | 61  | 44  | 19 | 40  |
| Pdr3p  | 10  | 14  | 35  | 9   | 4  | 16  |
| Pdr8p  | 1   | 0   | 0   | 0   | 0  | 0   |
| Phd1p  | 80  | 49  | 94  | 60  | 23 | 62  |
| Pho2p  | 24  | 21  | 11  | 22  | 11 | 9   |
| Pho4p  | 38  | 30  | 47  | 24  | 18 | 20  |
| Pip2p  | 21  | 14  | 42  | 21  | 3  | 17  |
| Plm2p  | 23  | 16  | 27  | 23  | 9  | 10  |
| Pog1p  | 11  | 4   | 9   | 14  | 1  | 2   |
| Ppr1p  | 8   | 1   | 0   | 4   | 0  | 0   |
| Put3p  | 15  | 18  | 24  | 11  | 4  | 16  |
| Rap1p  | 303 | 139 | 207 | 230 | 63 | 120 |
| Rds1p  | 3   | 4   | 5   | 1   | 0  | 2   |
| Rds2p  | 20  | 24  | 70  | 12  | 8  | 48  |
| Reb1p  | 77  | 39  | 47  | 62  | 15 | 25  |
| Rgm1p  | 10  | 6   | 4   | 7   | 1  | 2   |

|         |     |     |     |     |    |     |
|---------|-----|-----|-----|-----|----|-----|
| Rgt1p   | 5   | 4   | 9   | 7   | 1  | 3   |
| Rlm1p   | 15  | 6   | 16  | 11  | 1  | 6   |
| Rme1p   | 19  | 7   | 9   | 17  | 5  | 4   |
| Rpn4p   | 15  | 17  | 31  | 9   | 2  | 12  |
| Rsf2p   | 4   | 1   | 6   | 2   | 1  | 2   |
| Rtg1p   | 10  | 6   | 12  | 3   | 2  | 4   |
| Rtg3p   | 26  | 22  | 38  | 14  | 8  | 19  |
| Rts2p   | 0   | 2   | 1   | 1   | 0  | 0   |
| Sfl1p   | 4   | 2   | 7   | 3   | 1  | 1   |
| Sfp1p   | 103 | 7   | 18  | 91  | 4  | 8   |
| Sip4p   | 12  | 10  | 8   | 8   | 5  | 4   |
| Skn7p   | 78  | 65  | 94  | 57  | 29 | 73  |
| Sko1p   | 96  | 112 | 105 | 75  | 44 | 84  |
| Smp1p   | 35  | 22  | 28  | 23  | 9  | 17  |
| Sok2p   | 112 | 112 | 169 | 88  | 43 | 113 |
| Spt23p  | 279 | 200 | 312 | 235 | 72 | 182 |
| Srd1p   | 8   | 4   | 8   | 5   | 0  | 4   |
| Stb1p   | 11  | 1   | 4   | 9   | 1  | 0   |
| Stb5p   | 43  | 42  | 61  | 27  | 17 | 48  |
| Ste12p  | 350 | 217 | 324 | 236 | 87 | 196 |
| Stp1p   | 13  | 10  | 15  | 13  | 8  | 6   |
| Stp2p   | 27  | 9   | 12  | 17  | 6  | 6   |
| Sua7p   | 4   | 1   | 1   | 4   | 1  | 0   |
| Swi4p   | 82  | 39  | 69  | 58  | 19 | 40  |
| Swi5p   | 24  | 19  | 29  | 17  | 8  | 13  |
| Swi6p   | 59  | 14  | 33  | 44  | 9  | 16  |
| Tbf1p   | 83  | 45  | 69  | 54  | 20 | 44  |
| Tec1p   | 73  | 61  | 100 | 66  | 25 | 69  |
| Thi2p   | 7   | 5   | 9   | 4   | 2  | 3   |
| Tos4p   | 22  | 15  | 23  | 23  | 6  | 12  |
| Tos8p   | 43  | 28  | 45  | 35  | 8  | 17  |
| Tye7p   | 22  | 7   | 13  | 17  | 6  | 7   |
| Uga3p   | 10  | 6   | 9   | 10  | 2  | 4   |
| Upc2p   | 5   | 1   | 7   | 2   | 1  | 3   |
| Usv1p   | 5   | 4   | 3   | 3   | 2  | 3   |
| War1p   | 4   | 2   | 2   | 5   | 1  | 1   |
| Yap1p   | 80  | 95  | 99  | 66  | 48 | 64  |
| Yap3p   | 3   | 1   | 4   | 5   | 1  | 1   |
| Yap5p   | 89  | 85  | 78  | 80  | 46 | 64  |
| Yap6p   | 161 | 127 | 144 | 109 | 62 | 116 |
| Yap7p   | 16  | 26  | 32  | 14  | 15 | 17  |
| YJL206C | 3   | 4   | 7   | 2   | 2  | 5   |
| Yrr1p   | 3   | 0   | 2   | 1   | 0  | 1   |
| Zap1p   | 12  | 4   | 10  | 10  | 4  | 3   |

**Additional file 3 - Association between *S. cerevisiae* genes whose expression were down-regulated along the single or mixed wine fermentations with their documented regulators**

|         | Sc 24h | Sc 48h | Sc 96h | Mc 24h | Mc 48h | Mc 96h |
|---------|--------|--------|--------|--------|--------|--------|
| Abf1p   | 331    | 334    | 253    | 225    | 146    | 153    |
| Cbf1p   | 159    | 139    | 94     | 97     | 58     | 59     |
| Cin5p   | 272    | 195    | 124    | 189    | 95     | 85     |
| Dal80p  | 10     | 7      | 4      | 5      | 6      | 2      |
| Dig1p   | 5      | 10     | 13     | 2      | 1      | 2      |
| Elp6p   | 1      | 1      | 0      | 1      | 1      | 0      |
| Fhl1p   | 161    | 214    | 172    | 123    | 66     | 144    |
| Fkh1p   | 39     | 60     | 49     | 21     | 25     | 22     |
| Fkh2p   | 57     | 77     | 59     | 29     | 27     | 37     |
| Gal80p  | 1      | 0      | 0      | 1      | 1      | 0      |
| Gat3p   | 21     | 33     | 26     | 10     | 5      | 23     |
| Gsm1p   | 7      | 4      | 0      | 9      | 4      | 0      |
| Gzf3p   | 9      | 4      | 3      | 5      | 1      | 2      |
| Hir1p   | 9      | 9      | 11     | 4      | 5      | 5      |
| Hir2p   | 14     | 10     | 4      | 6      | 8      | 3      |
| Hmo1p   | 207    | 223    | 169    | 169    | 76     | 125    |
| Hms1p   | 7      | 9      | 7      | 2      | 3      | 5      |
| Hms2p   | 9      | 9      | 6      | 7      | 1      | 2      |
| Ixr1p   | 27     | 23     | 18     | 21     | 13     | 15     |
| Leu3p   | 40     | 46     | 34     | 27     | 15     | 25     |
| Mcm1p   | 73     | 90     | 60     | 40     | 27     | 33     |
| Mga1p   | 63     | 52     | 43     | 41     | 34     | 21     |
| Mga2p   | 7      | 3      | 2      | 5      | 1      | 1      |
| Mig1p   | 22     | 17     | 16     | 12     | 8      | 12     |
| Mig2p   | 5      | 3      | 3      | 3      | 2      | 2      |
| Mig3p   | 4      | 0      | 0      | 3      | 0      | 0      |
| Mot3p   | 16     | 14     | 11     | 13     | 9      | 5      |
| Nrg1p   | 77     | 43     | 25     | 55     | 30     | 9      |
| Oaf3p   | 68     | 36     | 19     | 48     | 23     | 9      |
| Plm2p   | 37     | 33     | 27     | 21     | 17     | 16     |
| Pog1p   | 11     | 13     | 11     | 5      | 8      | 8      |
| Rdr1p   | 1      | 1      | 0      | 1      | 1      | 0      |
| Rds1p   | 8      | 3      | 4      | 3      | 0      | 1      |
| Reb1p   | 70     | 78     | 81     | 41     | 36     | 37     |
| Rfx1p   | 77     | 87     | 66     | 44     | 38     | 33     |
| Rgt1p   | 12     | 10     | 6      | 5      | 4      | 6      |
| Rim101p | 21     | 22     | 13     | 15     | 10     | 5      |
| Rme1p   | 11     | 20     | 20     | 6      | 3      | 16     |
| Rox1p   | 36     | 34     | 26     | 29     | 20     | 14     |
| Rph1p   | 19     | 16     | 11     | 6      | 3      | 7      |
| Rsf2p   | 6      | 7      | 4      | 3      | 1      | 2      |
| Rtg1p   | 16     | 15     | 11     | 6      | 0      | 3      |
| Rtg3p   | 52     | 34     | 25     | 33     | 15     | 6      |
| Rts2p   | 3      | 0      | 0      | 0      | 1      | 0      |

|         |     |     |     |     |     |     |
|---------|-----|-----|-----|-----|-----|-----|
| Sfl1p   | 8   | 5   | 4   | 4   | 1   | 2   |
| Skn7p   | 134 | 104 | 68  | 107 | 55  | 46  |
| Sko1p   | 177 | 113 | 69  | 117 | 60  | 51  |
| Sok2p   | 237 | 151 | 100 | 178 | 90  | 64  |
| Srd1p   | 12  | 10  | 9   | 5   | 4   | 4   |
| Stb5p   | 88  | 53  | 35  | 68  | 36  | 22  |
| Sua7p   | 1   | 4   | 2   | 0   | 1   | 3   |
| Sum1p   | 28  | 21  | 13  | 22  | 9   | 6   |
| Tbf1p   | 93  | 96  | 72  | 67  | 43  | 41  |
| Tos4p   | 32  | 26  | 21  | 19  | 19  | 14  |
| Tos8p   | 63  | 52  | 42  | 26  | 24  | 22  |
| Tup1p   | 41  | 57  | 43  | 31  | 19  | 31  |
| Ume6p   | 59  | 49  | 23  | 40  | 20  | 8   |
| Usv1p   | 6   | 6   | 4   | 3   | 1   | 2   |
| Xbp1p   | 79  | 69  | 48  | 53  | 34  | 30  |
| Yap6p   | 227 | 193 | 133 | 169 | 78  | 92  |
| Yhp1p   | 27  | 35  | 26  | 14  | 15  | 12  |
| YJL206C | 10  | 8   | 4   | 8   | 3   | 1   |
| Yox1p   | 84  | 111 | 82  | 36  | 42  | 40  |
| Yrm1p   | 344 | 381 | 336 | 193 | 150 | 195 |
